# Supplementary material for: Early B cell factor 4 modulates FAS-mediated apoptosis and promotes cytotoxic function in human immune cells
Source: PubMed Central journal article supplement — Proc Natl Acad Sci U S A. 2022 Aug 8;119(33):e2208522119. doi: 10.1073/pnas.2208522119 (PMC9388157; doi:10.1073/pnas.2208522119), 2022-08-08
Supplement: pnas.2208522119.sapp.pdf [file pnas.2208522119.sapp.pdf]

## **Supplementary Information for**

## **Early B Cell Factor 4 modulates FAS-mediated apoptosis and promotes cytotoxic function in human immune cells**

Satoshi Kubo, Rhea Kataria, Yikun Yao, Justin Q. Gabrielski, Lixin Zheng, Tovah E. Markowitz, Waipan Chan, Jian Song, Arun K. Boddapati, Keita Saeki, Björn Häupl, Ann Y. Park, Runa Cheng, Jing Cui, Thomas Oellerich, Michael J. Lenardo

Michael J. Lenardo

Email: [lenardo@nih.gov](mailto:lenardo@nih.gov)

Satoshi Kubo

Email: [satoshi.kubo@nih.gov](mailto:satoshi.kubo@nih.gov)

### **This PDF file includes:**

- Supplementary Materials and Methods
- Figures S1 to S4
- Tables S1 to S4
- SI References

## Supplementary Materials and Methods

*Whole genome CRISPR screen.* The Human GeCKOv2 CRISPR knockout pooled library (Addgene, #1000000049) was used. The workflow is illustrated in Fig. 1a. The GeCKO library is divided into two sublibraries, A and B. Each library was transduced to Jurkat T cells at a low multiplicity of infection (0.3) to ensure that most cells receive only one viral construct. On day 3, Jurkat T cells were selected with 0.5  $\mu\text{g}/\text{mL}$  puromycin. Then, cells were stimulated with 100 ng/ml FASL for 10 days. After treatment, genomic DNA was extracted to ensure over 500 $\times$  coverage. The sgRNA sequences were amplified and deep sequencing was performed.

*In Vitro Culture of Cells:* Cells were cultured as described before (1). Briefly, 293T cells (CRL-3216) and Jurkat T cells, Clone E6-1 (TIB-152) were purchased from ATCC. 293T cells were cultured in complete DMEM. Jurkat T cells were cultured in complete RPMI. Primary T cells were cultured in complete RPMI with IL-2 and primary NK cells were cultured in complete RPMI with IL-2 and IL-15. Primary CD4, CD8 T cells and NK cells were isolated from PBMCs using the respective Miltenyi Pan Monocyte Isolation Kit. Macrophages were differentiated from CD14 monocytes by culturing with 50 ng/ml of GM-CSF and 50 ng/ml of M-CSF for 7 days.

*Generation of EBF4 antibody.* In collaboration with GenScript, the immunogen protein (sequence:

MDALPRSGLNLKEEPLLPAGLGSVRSWMQGAGILDASTAAQSGVGLARAHFEK  
QPPSNLRKSNFFHFVLAMYDRQGQPVEVERTAFIDFVEKDREPGAECTNNGIHY

RLRLVYNNGLRTEQDLYVRLIDSMKQAIIEGQDKNPEMCRVLLTHEIMCSRC  
CDRKSCGNRNETPSDPVIIDRFLLKFFLKCQNCLKNAGNPRDMRRFQVVVSTTV  
SVDGHVLAVSDNMFVHNNSKHGRRARRLDPSEAATPCIKAISPGEGWTTGGATV  
IVIGDNFFDGLQVVFVGNVWSELITPHAIRVQTPPRHIPGVVEVTLSYKSKQFCK  
GCPGRFVYTALNEPTIDYGFQRLQKVIPRHPGDPERLPKEVLLKRAADLAEALYG  
VPGSNQELLLKRAADVAEALYSTPRAPGPLAPLAPSHPHPAVVGINAFSSPLAIAV  
GDATPGPEPGYARSCSSASPRGFAPSPGSQQSGYGGGLGAGLGGYGAPGVAGLG  
VPGSPSFLNGSTATSPFAIMPSSPPLAAASSMSLPAAAPTTSVFSFSPVNMISAVKQ  
RSAFAPVLRPPSSPPQACPRAHGEGLPDQSFEDSDKFHSPARGLQGLAYSHHHHH

H) was synthesized. Two New Zealand rabbits were immunized with three injections by conventional protocol. 7 days after the 3rd immunization, immunized animal sera were tested by ELISA for immune response. 0.02% sodium azide was added as a preservative. The antibody specificity was confirmed by immunoblotting in EBF4 overexpression and knockout Jurkat T cells.

*Immunoblot.* Cells were lysed in either Triton X-100 or RIPA (EDTA-free) Lysis buffer containing Mini EDTA-free Protease Inhibitor Cocktail (Sigma) and Phosphatase Inhibitor Cocktail (Sigma). Lysates were standardized using the BCA Protein Assay Kit (Pierce). Proteins were resolved by SDS-PAGE, transferred onto nitrocellulose membranes and blocked in TBS-T (Tris Buffered Saline, 0.1% Tween-20) containing 5% milk before primary antibody incubation. Densitometric analysis was performed using the ImageJ software.

*DISC assay.* Nontarget and EBF4 KO Jurkat T cells were treated with and without 1 ug/ml APO-1-3 for 0 to 120 minutes. Following stimulation, cells were collected and washed in ice-cold PBS to remove excess APO-1-3. Cells were lysed in 500 ul of TNTG Lysis Buffer (complete Triton-X Lysis Buffer with 10% glycerol) for 30 minutes on ice, and then centrifuged at 14000 xg for 14 minutes. The supernatant for each sample was collected to a new tube. For immunoprecipitation, Protein G magnetic Dynabeads were washed twice in Triton X lysis buffer, then resuspended in 50 ul of lysis buffer and added to the cell supernatants. 2 ul APO-1-3 was added to the untreated controls. Cell extract and beads were placed under rotating agitation at 4°C for 2 hours. Beads were washed 4 times using lysis buffer and a magnetic rack. Samples were heated at 95°C for 5 minutes in 20 ul of 2X SDS Sample Buffer. Resulting lysates were run on a 4-12% Bis-Tris gel, and immunoblotted for members of the DISC.

*Cycloheximide (CHX) chase assay.* Cells were collected and washed in PBS before being resuspended in RPMI at a concentration of  $2 \times 10^6$  cells/ml. They were then treated with 10 µg/ml cycloheximide and were collected for Immunoblot at indicated time points.

*CRISPR-Cas9 knockout.* EBF4 knockout was performed as described before (1). EBF4 knockout plasmid was generated from the lentiCRISPRv2 vector (Addgene). Knockout plasmids and plasmids containing PAX2 and VSV-G (Addgene) were transfected into 293T cells using Lipofectamine 3000 reagent (Invitrogen). The culture supernatants containing lentivirus were harvested. Cell lines were seeded in complete medium supplemented with Polybrene (Sigma) and lentiviruses. Electroporation was also

performed for knockout (1). Briefly, cells were electroporated with a crRNA and tracrRNA (Integrated DNA Technologies) complex and Cas9 protein (Thermo fisher). After CRISPR screening, we used two different sgRNA constructs in subsequent experiments. Namely, the same sgRNA (AGTCGATGAGACGCACGTA) from the CRISPR screen and another sgRNA construct (ACCGGAAGAGCTGTGGCAAC).

*Overexpression of EBF4.* Lentiviral transduction was performed as described before (1). Briefly, the lentiviral EBF4 plasmid or FLAG tag EBF4 plasmid was generated from pLV-EF1a-IRES-Puro (Addgene) vector by replacing the puromycin fragment with a truncated EGFR protein. The lentiviral EBF4 plasmid and plasmids containing PAX2 and VSV-G (Addgene) were transfected into 293T cells using Lipofectamine 3000 reagent (Invitrogen).

*FAS killing assay.*  $2 \times 10^6$  cells/ml were cultured in 96 well plate with FAS ligand. On day 1, cells were stained with propidium iodide (PI) and analyzed by flow cytometry analysis. The cells were counted for 30 seconds and the actual cell number of PI negative cells at each FASL dose were compared to that of unstimulated cells. For EBF4 overexpression cells, the cells were stained with EGFR and EGFR positive cells were considered as EBF4 overexpressor cells.

*Quantitative RT-PCR.* RT-qPCR was performed as described before (1). RNA was isolated and cDNA was synthesized. PCR with reverse transcription was performed in a

StepOnePlus detection system (Applied Biosystems). Relative Quantification of mRNAs were calculated by the double delta Ct method.

*Bio-ID-mass spectrometry analysis.*

Lentivirus were prepared by transfection of HEK293T cells according to manufacturer's instructions with pLKO-BioID2-EBF4:P2A:P2B = 4:3:1 ug respectively, and used for transduction of and puromycin selection Jurkat cells. pLKO-BioID2-EGFP and pLKP-BioID2\_SBNO2 were also used for control virus production and transductions. Immunoblot confirmed correct expression of corresponding bioID2-fusion proteins in the transduced Jurkat cells. Jurkat cells stably expressing BioID2-EGFP, -EBF4, and -SBNO2 were correspondingly seeded with light, medium, and heavy stable isotope labeling amino acids in culture (SILAC) for 10 to 14 days. The cell cultures were then pulsed with 50 ug/mL of D-biotin (Invitrogen) for the last 24-hour culture before harvesting. Exact 100 x 10<sup>6</sup> cells from each SILAC cultured cells were pooled and washed with 40 mL cold PBS for 3 times. The pooled cell pellet was then lysed with 30 ul per million cells of SILAC-lysis buffer (50 mM Tris.Cl pH 7.5, 145 mM NaCl, 1% NP-40, 0.5% deoxycholate, 0.05% SDS, 10% glycerol, 1 x (Roshe) EDTA-free protease inhibitor cocktail), mixing well and on ice for 20 minutes. The lysates were centrifuged at 12,000 x g at 4 C for 10 minutes and the supernatant was transferred into a fresh tube for streptavidin pulling down. A volume of 300 uL of SILAC-lysis-buffer washed Dynabeads MyOne Streptavidin C1 (Invitrogen) into the cleared lysates, rocking in cold room for 4 hours. The beads were then washed by using magnetic separation module, washing with 1 mL of SILAC-lysis buffer for 3 rounds. The washed beads were resuspended in 50 uL of NuPage 4 x LDS loading dye with 1x

NuPage Sample Reducing Agent (Invitrogen). The samples were frozen at -80 before subjected to mass spectrometry analysis which was conducted basically as described previously (2). In brief, the samples were separated by SDS-PAGE and subjected to in-gel protein digestion with trypsin. The peptide mixtures were analyzed by liquid chromatography and tandem mass spectrometry (LC-MS/MS) on a UHPLC system coupled to a Q Exactive quadrupole-Orbitrap mass spectrometer via an electrospray ion source (all Thermo Fisher Scientific). For protein identification and SILAC-based quantitation the MS raw data was processed with the MaxQuant software (3). Forty candidates out of 2228 were determined by using a  $\log_2$ -fold change cutoff of 1.7 or higher (Fig. 3c and Supplemental table 2). These candidates were filtered using CRAPome/REPRINT (Resource for Evaluation of Protein Interaction Networks) to remove contaminants and background noise and then evaluated by the NIAID SIGNAL (Selection by Iterative pathway Group and Network Analysis Looping) database to classify KEGG biological pathways (4). Color intensity indicates the mean fold change (scale bottom).

*Transcriptome analysis.* Total RNA from un-stimulated Jurkat T cells (EBF4 knock out vs non-target guide RNA treated and Lentiviral transduction of EBF4 vs empty vector) was extracted and were used to prepare RNA-seq libraries. In collaboration with Novogene, the mRNA-seq was performed on the Illumina platform (PE150). RNA-seq data was processed using the Pipeliner workflow (<https://github.com/CCBR/Pipeliner>). Reads were trimmed using Cutadapt v1.18 and aligned to the human hg38 reference genome and Gencode release28 using two-pass STAR v2.7.0f (5, 6). RSEM v1.3.0 was used for gene-level

expression quantification, and limma v 3.38.3 was used for *voom* quantile normalization and differential expression analysis (7, 8).

*Chromatin immunoprecipitation and DNA sequencing.* FLAG tagged EBF4 Jurkat T cells were isolated by EGFR biotinylated antibody (R&D) and were cross-linked in 1% formaldehyde for 15 minutes at room temperature, quenched in 2.5 M glycine for 5 minutes, washed, and resuspended in 1st lysis buffer (50 mM HEPES-KOH, 140 mM NaCl, 1mM EDTA, 10% Glycerol, 0.5% NP-40, 0.25% TritonX-100, and proteinase inhibitor cocktail) and incubated 10 minutes. The cells were resuspended with 2nd lysis buffer (20 mM Tris-HCl, 200 mM NaCl, 2 mM EDTA, 0.5 mM EGTA, and proteinase inhibitor cocktail) and incubated 10 minutes. Cells were resuspended with 3rd lysis buffer (20 mM Tris-HCl, 150 mM NaCl, 1 mM EDTA, 0.5 mM EGTA, 1% TritonX-100, 0.1% Na-Deoxycholate, 0.1% SDS, and proteinase inhibitor cocktail) and incubated 10 minutes. Cross-linked chromatin was sonicated for 4 minutes using a Biruptor-Pico (30 seconds on/30 seconds off). Precleared chromatin extract was incubated overnight at 4°C with anti-FLAG antibody (Cell signaling) and immunoprecipitated with protein G sepharose beads. DNA was used to generate a standard Illumina sequencing library. The sequencing was performed on the Illumina platform (PE150).

*ChIP-seq analysis.* Reads were trimmed with Cutadapt v1.18. All reads aligning to the Encode hg38 v1 blacklist regions were identified by alignment with BWA v0.7.17 and removed with Picard SamToFastq (<https://broadinstitute.github.io/picard/>) (9, 10). The remaining reads were aligned to the hg38 reference genome using BWA. Reads with a



mapQ score less than 6 were removed with SAMtools v1.6 and PCR duplicates were removed with Picard MarkDuplicates (11). Data was converted into bigwigs for viewing and normalized by reads per genomic content (RPGC) using deepTools v3.0.1 using the following parameters: --binSize 25 --smoothLength 75 --effectiveGenomeSize 2700000000 --centerReads --normalizeUsing RPGC. RPGC-normalized input values were subtracted from RPGC-normalized ChIP values of matching cell type genome-wide using deepTools with --binSize 25 (12). Peaks were called using macsNarrow (macs v2.1.1) with the following parameter: -f "BAMPE" (13). Significant peaks were defined as those passing IDR across two biological replicates (14). Motif analyses were completed using the MEME suite v5.1.0 (15).

*Assay for Transposase-Accessible Chromatin using sequencing.* We followed the Omni-ATAC protocol (16). Briefly, 50000 cells were washed and lysed in lysis buffer (10 mM Tris-HCl (pH 7.4), 10 mM NaCl, 3 mM MgCl<sub>2</sub>) containing 0.1% NP40, 0.1% Tween-20, and 0.01% Digitonin for 10 min on ice to prepare the nuclei. Immediately after lysis, nuclei were spun at 500 x g for 10 min to remove the supernatant. Nuclei were then incubated with Tn5 transposon and tagmentation buffer (20 mM Tris-HCl (pH 7.6), 10 mM MgCl<sub>2</sub>, 20% Dimethylformamide) containing 0.1% Tween-20 and 0.005% Digitonin at 37 °C for 30 min. Stop buffer was added directly into the reaction to end tagmentation. PCR was performed to amplify the library. Libraries were then purified with SPRI (Beckman) beads and deep sequencing was performed. The sequencing was performed on the Illumina platform (HiSeq PE150). Samples were trimmed for adapters using Cutadapt v 1.18 before alignment. The trimmed reads were aligned to the hg38 reference using Bowtie2 v2.3.4.1

with flag `-k 10` (17). The peaks were called using Genrich v0.6 (<https://github.com/jsh58/Genrich>) with the following flags `-j -y -r -v -d 150 -m 5 -e chrM,chrY`. Genrich-produced bedgraphs were normalized by library size (reads per million sequenced reads, RPM) for visualization. Topologically associating domains for Jurkat T cells were identified using the platform of Yue lab (<http://yuelab.org/>) from published paper (18).

*Reporter assay.* Luciferase reporter assays were carried out using pNL2.1 [Nluc/Hygro] (Promega) or pGL4.23 [luc2/minP]. pNL2.1 with each promoter region sequence or pGL4.23 with 5 repeats of “CCCAGGGG” was co-transfected with Renilla vector and EBF4 overexpression vector or empty vector, into HEK293 cells in six-well plates using Lipofectamine 3000 Transfection Reagent (Invitrogen). EBF4 was tested in five different doses. After 24 hours of transfection, the cell lysate was processed for luciferase activity using the luciferase reporter system, according to the manufacturer’s instructions (Promega Nano-Glo<sup>®</sup> Luciferase Assay System and Renilla Luciferase Assay System). Luciferase was measured and was calculated as relative light units normalized to transfection control (Renilla).

*Single cell data analysis.* Human and mouse white adipose tissue cell Seurat clusters and subclusters found on publicly available database were used to identify EBF4 positive cell populations (19). Quality control and downstream analysis conducted by the Rosen Lab and were as described in the study (19). Data was visualized with UMAP embedding using

the Seurat package in R version 4.1.3. Previously annotated cell types were grouped into larger categories as shown in Fig. 2D and Fig. 3F.

*Ingenuity upstream regulator analysis and Gene set enrichment analysis (GSEA).*

Upstream regulator analyses were performed using QIAGEN's Ingenuity® Pathway Analysis (IPA®, QIAGEN Redwood City, [www.qiagen.com/ingenuity](http://www.qiagen.com/ingenuity)) tools. Comparison between control vs overexpression cells, the genes were selected from a log<sub>2</sub>-fold change cutoff of 1.5 or higher or cutoff of -1.5 or lower. GSEA was performed using the WEB-based Gene Set Analysis Toolkit (WebGestalt).(20)

*Mice.* Animal procedures were performed under protocols approved by the NIAID Animal Care and Use Committee. Ebf4-deficient mice were generated from Taconic C57BL/6 mice using the CRISPR-Cas9 genome-editing method. Briefly, 4-week-old C57BL/6 females were super-ovulated using 5 IU of pregnant mare serum gonadotropin followed 48 hr later with 5IU of human chorionic gonadotropin which was followed by mating with C57BL/6 males. The pregnant females were sacrificed, and the embryos were collected from the oviducts. The embryos were then electroporated with a mixture of Cas9 (200ng/ul, IDT DNA., Coralville, IA), sgRNAs (50ng/ul each, Synthego, Melano Park, CA) using NEPA21 electroporator (NapaGene, Japan) following manufacturer's guidelines. The embryos were then transferred into oviducts of CD1 pseudo-pregnant mothers. Once the pups were weaned at three weeks, PCR analysis to detect exon deletion was done from the ear punch biopsies. The followings are the sequences of sgRNAs. Ebf4\_198f,

ccuacggcucccgucuccca; Ebf4\_70r, agaccggccgagucucccccg; Ebf4\_105f,  
uugggggcgcccacgaacug; Ebf4\_232r, uuaccucugcgccgcggu.

*Statistical analysis.* Data are represented as mean  $\pm$  SD with a significant difference reported as \*  $p \leq 0.05$ , \*\*  $p \leq 0.01$  and \*\*\*  $p \leq 0.001$ . Two-way comparisons were calculated using a two-tailed, paired or unpaired Student's *t* test.

### **Data Availability**

All study data are included in the article and/or SI Appendix. All sequencing data will be deposited in the GEO database upon publication.

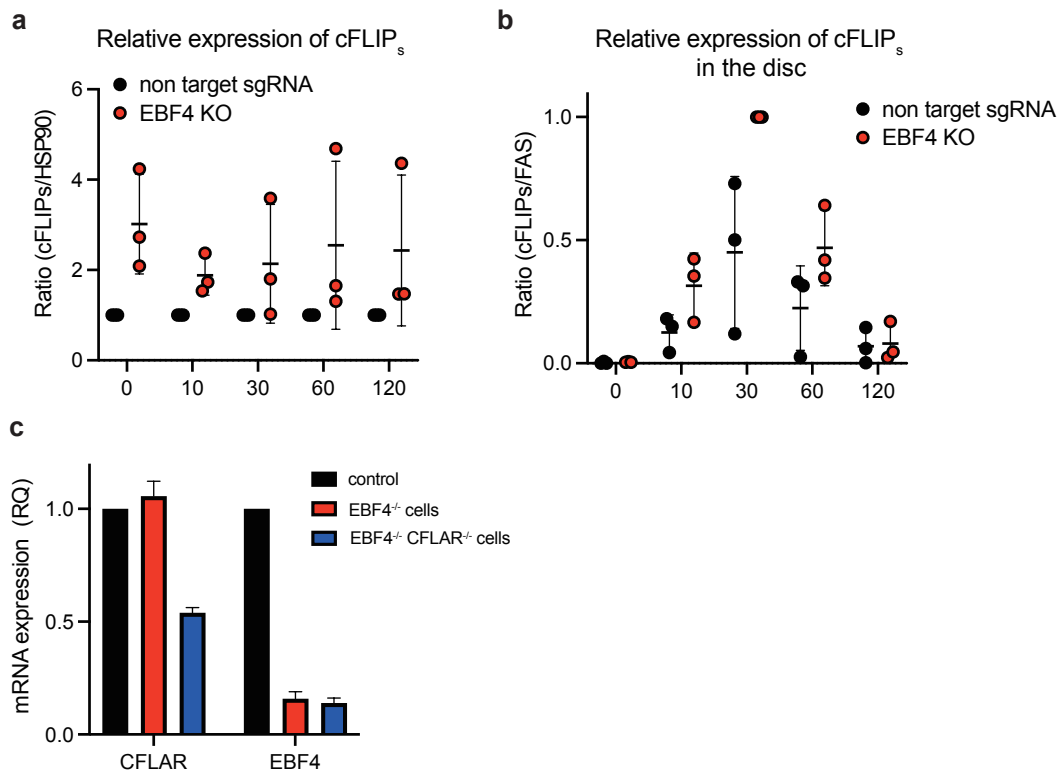

**Figure S1.** (a) Relative Intensity of c-FLIP protein levels in control and EBF4 KO Jurkat T cells to HSP90 loading control as quantified from immunoblots. (b) Relative intensity of c-FLIP protein levels at the DISC, standardized to pulldown by CD95, as quantified from immunoblots. (c) mRNA levels of CFLAR and EBF4 in EBF4 KO and CFLAR EBF4 double KO Jurkat T cells.

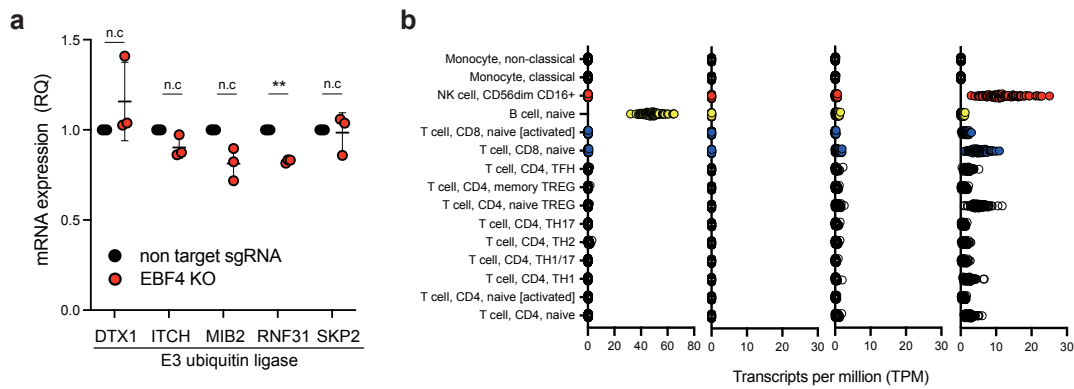

**Figure S2. (a)** mRNA levels of several E3 ubiquitin ligase involved in c-FLIP protein expression in control and EBF4 KO Jurkat T cells. **(b)** The EBF family members' gene expression by reanalysis of eQTL database (DICE; <https://dice-database.org>) are shown as boxplots. The levels of expression are depicted as transcripts per million (TPM).

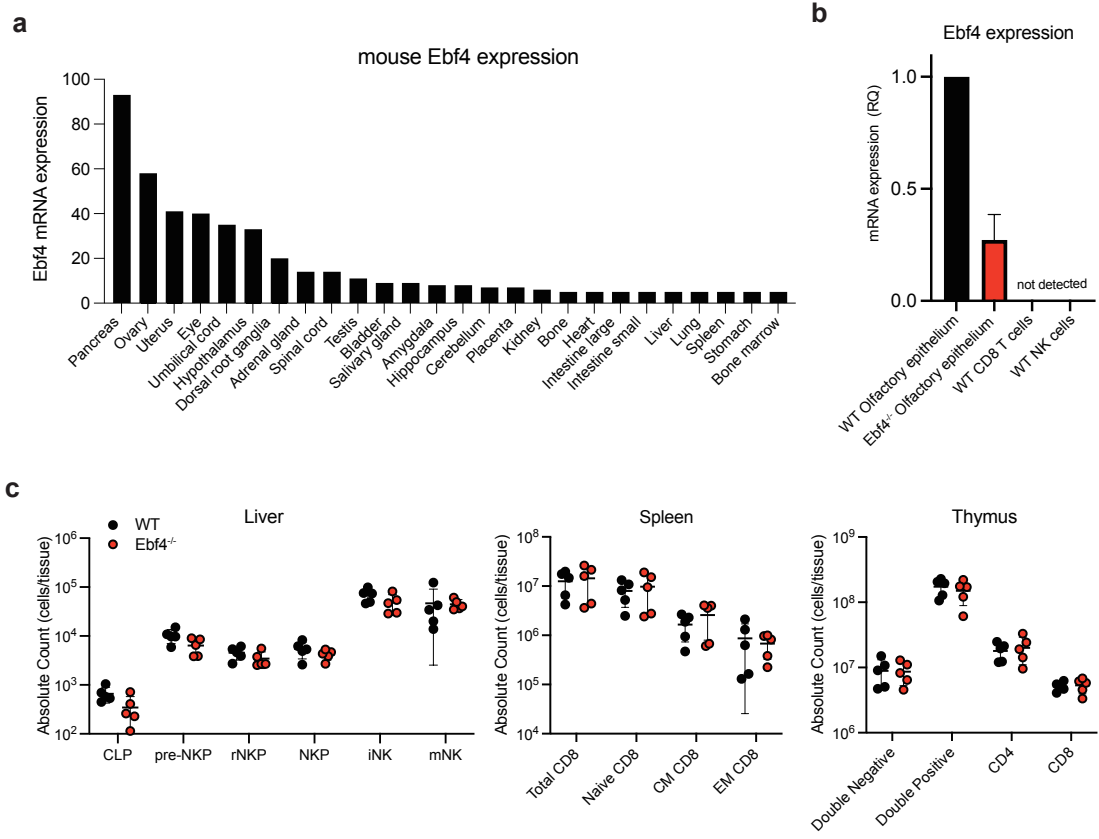

**Figure S3. (a)** EBF4 expression in different mouse tissues (<http://ds.biogps.org>). **(b)** EBF4 expression in WT and Ebf4<sup>-/-</sup> mouse olfactory epithelium, WT mouse CD8 T cells, and WT mouse NK cells as quantified by RT-qPCR. **(c)** Counts of NK and CD8 precursor populations in WT and Ebf4<sup>-/-</sup> mouse liver, spleen, and thymus.

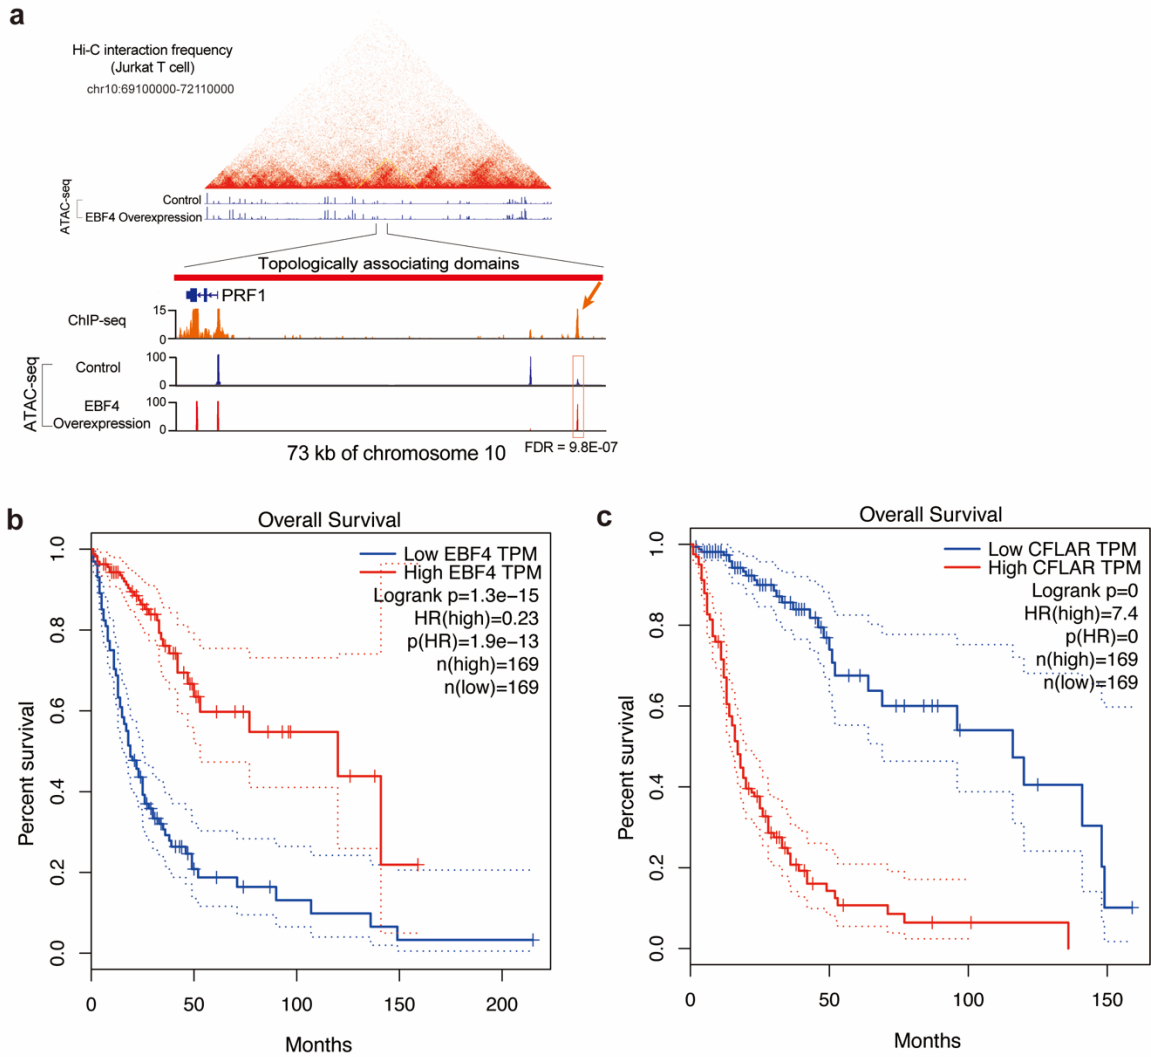

**Figure S4. (a)** ATAC-seq sequencing tracks from control and EBF4 overexpression Jurkat T cells for the PRF1 loci. **(b,c)** RNA expression of EBF4 with relation to survival data in the cancer genome atlas database. Kaplan-Meier survival curves of patients with glioma/glioblastomas stratified by high and low EBF4 expression (b) and CFLAR expression (c).



**Supplemental table 1** The top 50 gene list found in whole genome screen

| Rank      | Gene name                             | Log10 FC          |
|-----------|---------------------------------------|-------------------|
| <b>1</b>  | <b>FADD</b>                           | <b>3.4203626</b>  |
| 2         | LSP1                                  | 2.84692256        |
| <b>3</b>  | <b>FAS</b>                            | <b>2.7040191</b>  |
| 4         | Non Targeting Control                 | 2.62317629        |
| 5         | AMBRA1                                | 2.59151057        |
| 6         | OR2A12                                | 2.49855713        |
| 7         | AMTN                                  | 2.46072793        |
| 8         | CKLF                                  | 2.42207039        |
| <b>9</b>  | <b>CASP8</b>                          | <b>2.33563044</b> |
| 10        | SH3RF2                                | 2.31568199        |
| <b>11</b> | <b>EBF4</b>                           | <b>2.30179604</b> |
| 12        | LIMD1                                 | 2.29598947        |
| 13        | UAP1                                  | 2.26648976        |
| 14        | SSH3                                  | 2.26330662        |
| 15        | hsa-mir-2682                          | 2.25405724        |
| 16        | EPB42                                 | 2.24858955        |
| 17        | PAX5                                  | 2.24035363        |
| 18        | ARAP3                                 | 2.21899154        |
| 19        | WWC2                                  | 2.21816474        |
| 20        | hsa-mir-1915                          | 2.21366668        |
| 21        | POU5F1B                               | 2.2090089         |
| 22        | PPP2CA                                | 2.15465709        |
| 23        | NonTargetingControlGuideForHuman_0239 | 2.15432251        |
| 24        | OSTF1                                 | 2.12279072        |
| 25        | HOXB1                                 | 2.10619657        |
| 26        | GMPPA                                 | 2.0957561         |
| 27        | GLS2                                  | 2.0920836         |
| 28        | MX2                                   | 2.06206166        |
| 29        | OPN3                                  | 2.05691867        |
| 30        | CYP8B1                                | 2.05678985        |
| 31        | hsa-mir-663b                          | 2.05267605        |
| 32        | ING5                                  | 2.04986709        |
| 33        | IL18                                  | 2.04905338        |
| 34        | GGT1                                  | 2.04351946        |
| 35        | TAC3                                  | 2.04144849        |
| 36        | hsa-mir-184                           | 2.03588213        |
| 37        | SNRPB                                 | 2.02186898        |
| 38        | ARL5A                                 | 2.01604966        |
| 39        | VWF                                   | 1.99858905        |
| 40        | SRPK3                                 | 1.99576667        |
| 41        | SGCZ                                  | 1.98581126        |
| 42        | OR2K2                                 | 1.97515402        |
| 43        | ADCK5                                 | 1.96714072        |
| 44        | ZFP30                                 | 1.96707293        |
| 45        | hsa-mir-4492                          | 1.95880697        |
| 46        | OR6A2                                 | 1.95654921        |
| 47        | SUPT20HL1                             | 1.95515116        |
| 48        | IL17C                                 | 1.93466303        |
| 49        | SPRY1                                 | 1.92601401        |
| 50        | hsa-mir-4688                          | 1.92448516        |

**Supplemental table 2** The top 80 gene list found in Bio-ID-mass spectrometry analysis

| Rank | gene name | FC         | Rank | gene name | FC         |
|------|-----------|------------|------|-----------|------------|
| 1    | GSTM3     | 3.25859487 | 41   | VANGL2    | 1.84360042 |
| 2    | FDPS      | 3.10729669 | 42   | SLC25A1   | 1.84290027 |
| 3    | ANXA1     | 3.01080652 | 43   | DGKZ      | 1.8380003  |
| 4    | ACADM     | 2.92940974 | 44   | HSD17B11  | 1.8370998  |
| 5    | UBASH3B   | 2.72030799 | 45   | CCDC71L   | 1.8233999  |
| 6    | ARHGDIB   | 2.50659689 | 46   | VANGL1    | 1.82250023 |
| 7    | RASSF2    | 2.49640153 | 47   | PCIF1     | 1.81250001 |
| 8    | DHCR7     | 2.44399274 | 48   | DNAJA1    | 1.81230026 |
| 9    | ARPC4     | 2.39849594 | 49   | HSD17B7   | 1.79479989 |
| 10   | DGCR8     | 2.33669591 | 50   | SPTBN1    | 1.78830027 |
| 11   | TMEM173   | 2.27980432 | 51   | IKZF2     | 1.78760006 |
| 12   | FAR1      | 2.27100361 | 52   | ELMO2     | 1.78470051 |
| 13   | RAB8B     | 2.22809385 | 53   | PSMA6     | 1.78019959 |
| 14   | TMEM97    | 2.20749474 | 54   | DDX60     | 1.7779996  |
| 15   | EBP       | 2.18999868 | 55   | CLIC1     | 1.77629968 |
| 16   | LCP2      | 2.18039573 | 56   | MBNL1     | 1.77490032 |
| 17   | KLHL7     | 2.15410713 | 57   | PSMD5     | 1.77019955 |
| 18   | CS        | 2.12530515 | 58   | DUT       | 1.76559935 |
| 19   | PSMB10    | 2.0934029  | 59   | DNTTIP1   | 1.76130041 |
| 20   | VIM       | 2.07370403 | 60   | TAOK1     | 1.7541     |
| 21   | MYH9      | 2.06579916 | 61   | IDI1      | 1.75179991 |
| 22   | ETFB      | 2.06269427 | 62   | STAT5A    | 1.75059942 |
| 23   | NUDT1     | 2.04959662 | 63   | TAP1      | 1.75020025 |
| 24   | IDH2      | 2.015098   | 64   | TAP2      | 1.74450049 |
| 25   | AP3S2     | 1.98659943 | 65   | PPIA      | 1.72850047 |
| 26   | SDCBP     | 1.97690014 | 66   | MED12L    | 1.72260031 |
| 27   | LGALS9    | 1.97300006 | 67   | DTX3L     | 1.72220037 |
| 28   | POLD3     | 1.97119978 | 68   | PASK      | 1.71380029 |
| 29   | DTX1      | 1.96379999 | 69   | DDX39A    | 1.70290033 |
| 30   | TAF5L     | 1.95909995 | 70   | PTPN6     | 1.70130052 |
| 31   | DIP2B     | 1.95330062 | 71   | CDK2      | 1.69979999 |
| 32   | CBX2      | 1.94780061 | 72   | GMPPA     | 1.69419977 |
| 33   | PHF8      | 1.94530046 | 73   | RMI1      | 1.68250058 |
| 34   | CLPTM1    | 1.93680002 | 74   | MYL6      | 1.67930002 |
| 35   | NSDHL     | 1.91629942 | 75   | PLEKHA2   | 1.67790031 |
| 36   | PHF5A     | 1.89409934 | 76   | FDFT1     | 1.67740028 |
| 37   | STAT3     | 1.87240043 | 77   | YWHAQ     | 1.67480021 |
| 38   | GIMAP7    | 1.86980005 | 78   | AK4       | 1.67130032 |
| 39   | MAPK3     | 1.86709974 | 79   | PDK3      | 1.66739972 |
| 40   | RHOC      | 1.86269956 | 80   | PTK2B     | 1.65839998 |

**Supplemental table 3** The genes whose promoter regions EBF4 binds to and are subjected to transcriptional regulation by EBF4

| Gene name    | vs EBF4 overexpression (FC) | vs. EBF4 KO (FC)  | Baseline FPKM |
|--------------|-----------------------------|-------------------|---------------|
| ELL3         | 55.9059034                  | -1.1074002        | 1.15          |
| PLCH2        | 45.4217373                  | -1.8826868        | 0.02          |
| KREMEN2      | 10.3027371                  | -1.1168557        | 0.83          |
| <b>NKG7</b>  | <b>7.55152783</b>           | <b>-1.5700277</b> | <b>14.87</b>  |
| IZUMO4       | 7.04561091                  | -1.0972897        | 0.73          |
| POU2AF1      | 7.02340483                  | -1.47127          | 5.99          |
| CTTN         | 6.34063691                  | -1.2032746        | 3.02          |
| <b>TBX21</b> | <b>5.17378084</b>           | <b>-1.5649186</b> | <b>0.35</b>   |
| FAM20C       | 4.97080433                  | -3.3789969        | 0.76          |
| <b>GZMA</b>  | <b>4.91849643</b>           | <b>-3.8540211</b> | <b>24.44</b>  |
| HR           | 4.85875337                  | -1.8012456        | 3.44          |
| GRID1        | 4.33266456                  | -1.030178         | 1.8           |
| SUSD4        | 3.85048379                  | -1.5963616        | 12.02         |
| TNRC6C-AS1   | 3.54596354                  | -1.5127719        | 1.14          |
| FGF9         | 3.38621943                  | -1.105297         | 1.77          |
| SEMA6C       | 3.19376949                  | -1.2075929        | 3.35          |
| SLC4A11      | 3.07539705                  | -1.0045343        | 5.59          |
| JAML         | 3.07490843                  | -1.0238982        | 1.72          |
| ARSG         | 3.04450665                  | -1.1878685        | 1.98          |
| ADARB1       | 3.02044685                  | -1.2761288        | 12.57         |
| GORASP1      | 2.98794254                  | -1.0923173        | 20.07         |
| CHGB         | 2.96901078                  | -1.0182227        | 0.16          |
| ADORA2A      | 2.93844618                  | -1.0227293        | 3.05          |
| TSKU         | 2.89704773                  | -1.3594226        | 10.25         |
| GALNT6       | 2.88683548                  | -1.0181728        | 9.85          |
| CAMSAP2      | 2.85105266                  | -1.6714313        | 1.39          |
| JAK3         | 2.83156953                  | -1.3928444        | 5.94          |
| PRCP         | 2.7279387                   | -1.1174832        | 23.13         |
| ATP11A       | 2.71238522                  | -1.0258531        | 8.21          |
| GABRB3       | 2.66750574                  | -1.1742672        | 15.64         |
| C11orf95     | 2.65846927                  | -1.0895501        | 10.61         |
| AMPD2        | 2.64466698                  | -1.0371196        | 22.83         |
| CUEDC1       | 2.58880146                  | -1.331303         | 1.38          |
| LGALS3BP     | 2.58249978                  | -1.1245566        | 42.24         |
| CCDC107      | 2.44603879                  | -1.0438341        | 16.52         |
| PLEKHG5      | 2.4314816                   | -1.1032711        | 2.55          |
| NHLRC4       | 2.3630333                   | -1.9065575        | 1.23          |
| HCP5         | 2.35133787                  | -1.9352303        | 0.56          |
| ZDHHC14      | 2.31663915                  | -1.1925932        | 3.76          |
| GPR153       | 2.30846229                  | -1.0257735        | 9.89          |
| OSCP1        | 2.27706711                  | -1.1407142        | 3.38          |
| UCP2         | 2.18831364                  | -1.0402916        | 113.14        |
| SNHG26       | 2.17778777                  | -1.1017922        | 0.35          |
| AK4          | 2.14755761                  | -1.4368512        | 9.6           |
| GALNT10      | 2.13186222                  | -1.0736459        | 6.99          |
| TAPBP        | 2.09723823                  | -1.07264          | 27.75         |
| GIMAP6       | 2.04068217                  | -1.0567418        | 38.47         |

**Supplemental table 4** The genes whose intergenic or intron regions EBF4 binds to and are subjected to transcriptional regulation by EBF4

| Gene name    | vs EBF4 overexpression (FC) | vs. EBF4 KO (FC)  | Baseline FPKM |
|--------------|-----------------------------|-------------------|---------------|
| EBF4         | 477.409164                  | -5.6941509        | 2.43          |
| PLCH2        | 45.4217373                  | -1.8826868        | 0.02          |
| COL15A1      | 25.8443564                  | -1.0282488        | 0.07          |
| CD79A        | 25.3454439                  | -1.8490348        | 55.13         |
| TC2N         | 20.6873964                  | -2.7943114        | 0.32          |
| FOXO6        | 14.8252889                  | -1.0920284        | 4.38          |
| ACSL6        | 13.0959366                  | -1.1025862        | 2.88          |
| KCNK17       | 11.8709478                  | -3.1934107        | 0.1           |
| <b>GZMK</b>  | <b>11.6157526</b>           | <b>-2.4443275</b> | <b>1.23</b>   |
| PTGDR2       | 11.3841459                  | -1.5698488        | 1.26          |
| LFNG         | 10.4037076                  | -1.0430988        | 0.63          |
| ATF5         | 10.1906489                  | -1.0360922        | 16.03         |
| MEGF6        | 9.9465795                   | -3.1236131        | 0.77          |
| BTG2         | 9.58878225                  | -1.2087967        | 5.18          |
| RGL4         | 9.25233068                  | -1.2439614        | 10.57         |
| KCNC1        | 9.17072767                  | -2.1931563        | 0.07          |
| TLR5         | 8.54847376                  | -1.4518112        | 1.18          |
| <b>IL2RB</b> | <b>8.35432524</b>           | <b>-2.0369513</b> | <b>0.8</b>    |
| NT5E         | 8.32145596                  | -1.2165957        | 2.04          |
| COL6A3       | 7.88326776                  | -1.2480621        | 0.08          |
| DNAH17       | 7.75063552                  | -1.7776787        | 1.03          |
| IZUMO4       | 7.04561091                  | -1.0972897        | 0.73          |
| ZBTB7B       | 6.9792018                   | -1.3681513        | 0.37          |
| VIPR2        | 6.85652501                  | -1.0513157        | 0.92          |
| GRASP        | 6.82062031                  | -1.46542          | 13.43         |
| LINC00689    | 6.42124295                  | -1.5301905        | 0.05          |
| CTTN         | 6.34063691                  | -1.2032746        | 3.02          |
| MAT1A        | 6.19257592                  | -2.1763992        | 6.8           |
| SLC14A1      | 5.80544822                  | -2.3901095        | 1.44          |
| GRAMD2A      | 5.35238008                  | -1.4219084        | 0.13          |
| <b>TBX21</b> | <b>5.17378084</b>           | <b>-1.5649186</b> | <b>0.35</b>   |
| HS3ST3B1     | 5.08839602                  | -1.2790734        | 1.39          |
| MYL4         | 5.00519552                  | -2.0213854        | 6.19          |
| FAM20C       | 4.97080433                  | -3.3789969        | 0.76          |
| COL6A2       | 4.83251204                  | -7.5595383        | 0.72          |
| SLCO3A1      | 4.65167124                  | -1.4539571        | 6.19          |
| MGLL         | 4.6113942                   | -1.956129         | 0.74          |
| WNK2         | 4.43745331                  | -1.2464967        | 4.2           |
| <b>EOMES</b> | <b>4.33635189</b>           | <b>-1.5260864</b> | <b>5.14</b>   |
| GRID1        | 4.33266456                  | -1.030178         | 1.8           |
| GSDME        | 4.29209868                  | -1.0092355        | 4.22          |
| DDIT4        | 4.24382277                  | -1.1821961        | 90.72         |
| MICAL2       | 4.12742922                  | -1.7038706        | 5.93          |
| DOC2A        | 4.10003506                  | -1.0656287        | 6.49          |
| DCLK3        | 4.03167629                  | -1.5986213        | 1.08          |
| CHRNA9       | 3.94895294                  | -1.2432474        | 12.81         |
| RFLNA        | 3.88850227                  | -1.8950446        | 3.61          |
| SUSD4        | 3.85048379                  | -1.5963616        | 12.02         |
| UNC13A       | 3.82214683                  | -1.407711         | 0.24          |
| GNGT2        | 3.66247929                  | -1.0219844        | 6.85          |
| ITGB2        | 3.59020827                  | -1.4982292        | 84.1          |

|           |            |            |       |
|-----------|------------|------------|-------|
| RARA      | 3.5185188  | -1.0535065 | 6.7   |
| ZNF467    | 3.48424656 | -2.053673  | 2.68  |
| SPSB1     | 3.45615159 | -1.2511615 | 5.46  |
| MYL5      | 3.41612982 | -1.0174761 | 5.55  |
| CST7      | 3.39323855 | -1.4129125 | 13    |
| FGF9      | 3.38621943 | -1.105297  | 1.77  |
| LINC00963 | 3.37306238 | -2.2362805 | 0.91  |
| SYNGR1    | 3.31669378 | -1.2942762 | 8.4   |
| TNFRSF14  | 3.31286766 | -1.1371355 | 7.22  |
| DYNC1I1   | 3.2810702  | -1.8063154 | 0.83  |
| TAS1R3    | 3.25601983 | -1.10221   | 0.14  |
| TSC22D4   | 3.16525394 | -1.0344277 | 40.73 |
| RASSF2    | 3.15711394 | -1.197257  | 11.07 |
| PRF1      | 3.14733955 | -1.7377274 | 4.98  |
| ACOT11    | 3.11538185 | -1.5317111 | 0.96  |
| OAF       | 3.07388011 | -1.1333528 | 9.87  |
| RTN4R     | 3.05487448 | -1.4686044 | 5.54  |
| ARSG      | 3.04450665 | -1.1878685 | 1.98  |
| ADARB1    | 3.02044685 | -1.2761288 | 12.57 |
| ARHGEF4   | 3.0091869  | -4.0541592 | 0.16  |

**Supplemental table 5** The top genes for candidate E3 ligases found to have reduced expression in the EBF4 KO cells

| Gene Symbol | vs EBF4 KO (FC) |
|-------------|-----------------|
| RNF212      | -1.990078       |
| MID1        | -1.8073896      |
| ZNF521      | -1.7029595      |
| RNF125      | -1.6116808      |
| RNF157      | -1.5364857      |
| CHFR        | -1.4684585      |
| MEX3A       | -1.3148871      |
| TRAF5       | -1.2581956      |
| SMURF2      | -1.2387773      |
| ZNRF3       | -1.1836951      |
| CNOT4       | -1.1552732      |
| RNF44       | -1.1422184      |
| TRAF3       | -1.0950743      |
| PCGF3       | -1.0817099      |
| TRIM32      | -1.0620113      |

## SI References

1. S. Kubo *et al.*, Congenital iRHOM2 deficiency causes ADAM17 dysfunction and environmentally directed immunodysregulatory disease. *Nat Immunol* **23**, 75-85 (2022).
2. A. L. Shaffer, 3rd *et al.*, Overcoming Acquired Epigenetic Resistance to BTK Inhibitors. *Blood Cancer Discov* **2**, 630-647 (2021).
3. S. Tyanova, T. Temu, J. Cox, The MaxQuant computational platform for mass spectrometry-based shotgun proteomics. *Nat Protoc* **11**, 2301-2319 (2016).
4. S. Katz *et al.*, SIGNAL: A web-based iterative analysis platform integrating pathway and network approaches optimizes hit selection from genome-scale assays. *Cell Syst* **12**, 338-352 e335 (2021).
5. A. Dobin *et al.*, STAR: ultrafast universal RNA-seq aligner. *Bioinformatics* **29**, 15-21 (2013).
6. M. Martin, Cutadapt removes adapter sequences from high-throughput sequencing reads. *EMBnet.journal* **17**, 10 (2011).
7. B. Li, C. N. Dewey, RSEM: accurate transcript quantification from RNA-Seq data with or without a reference genome. *BMC Bioinformatics* **12**, 323 (2011).
8. M. E. Ritchie *et al.*, limma powers differential expression analyses for RNA-sequencing and microarray studies. *Nucleic Acids Res* **43**, e47 (2015).
9. E. P. Consortium, An integrated encyclopedia of DNA elements in the human genome. *Nature* **489**, 57-74 (2012).
10. H. Li, R. Durbin, Fast and accurate short read alignment with Burrows-Wheeler transform. *Bioinformatics* **25**, 1754-1760 (2009).
11. H. Li *et al.*, The Sequence Alignment/Map format and SAMtools. *Bioinformatics* **25**, 2078-2079 (2009).
12. F. Ramirez *et al.*, deepTools2: a next generation web server for deep-sequencing data analysis. *Nucleic Acids Res* **44**, W160-165 (2016).
13. Y. Zhang *et al.*, Model-based analysis of ChIP-Seq (MACS). *Genome Biol* **9**, R137 (2008).
14. Q. H. Li, J. B. Brown, H. Y. Huang, P. J. Bickel, Measuring Reproducibility of High-Throughput Experiments. *Annals of Applied Statistics* **5**, 1752-1779 (2011).
15. R. C. McLeay, T. L. Bailey, Motif Enrichment Analysis: a unified framework and an evaluation on ChIP data. *BMC Bioinformatics* **11**, 165 (2010).
16. M. R. Corces *et al.*, An improved ATAC-seq protocol reduces background and enables interrogation of frozen tissues. *Nat Methods* **14**, 959-962 (2017).
17. B. Langmead, S. L. Salzberg, Fast gapped-read alignment with Bowtie 2. *Nat Methods* **9**, 357-359 (2012).
18. A. Kloetgen *et al.*, Three-dimensional chromatin landscapes in T cell acute lymphoblastic leukemia. *Nature genetics* **52**, 388-400 (2020).
19. M. P. Emont *et al.*, A single-cell atlas of human and mouse white adipose tissue. *Nature* **603**, 926-933 (2022).
20. Y. Liao, J. Wang, E. J. Jaehnig, Z. Shi, B. Zhang, WebGestalt 2019: gene set analysis toolkit with revamped UIs and APIs. *Nucleic Acids Res* **47**, W199-W205 (2019).
